# Supplementary material for: Exome Sequencing of Plasma DNA Portrays the Mutation Landscape of Colorectal Cancer and Discovers Mutated VEGFR2 Receptors as Modulators of Antiangiogenic Therapies
Source: Oxford University Press journal article supplement (doi:10.1158/1078-0432.ccr-18-0103), 2018-03-27
Supplement: 10780432ccr180103-sup-195310_2_supp_4637047_p5ssyh.docx [file 10780432ccr180103-sup-195310_2_supp_4637047_p5ssyh.docx]

**Table S2:** Custom primers and probes designed based on the Thermofisher online design tool for TaqMan® genotyping assay for *KDR* c.2518C>T (VEGFR2 p.L840L). TaqMan® MGB (minor groove binder) probes incorporate a 5' reporter (VIC or FAM) and a 3' nonfluorescent quencher (NFQ).

| **Assay ID** | **Oligonucleotides** | **Sequence** | **5´ Reporter** | **3´ Reporter** |
| --- | --- | --- | --- | --- |
| AHRSSQR | primer forward | CTTGTTGCTGTTGTTGTTGACTCT | - | - |
| primer reverse | GCTTCAATCACTTGGCCAAAGG | - | - |
| probe wt | CGGCCAA**G**AGGCTTA | VIC | NFQ |
| probe L840F | CGGCCAA**A**AGGCTTA | FAM | NFQ |
