# Supplementary material for: Exome Sequencing of Plasma DNA Portrays the Mutation Landscape of Colorectal Cancer and Discovers Mutated VEGFR2 Receptors as Modulators of Antiangiogenic Therapies
Source: Oxford University Press journal article supplement (doi:10.1158/1078-0432.ccr-18-0103), 2018-03-27
Supplement: 10780432ccr180103-sup-195310_2_supp_4637048_p599yh.docx [file 10780432ccr180103-sup-195310_2_supp_4637048_p599yh.docx]

**Table S3:** Treatment regimens of the Avatar patient derived xenograft models carrying the VEGFR2 WT and L840F genotypes.

| **Treatment** | **Company (catalog)** | **Administration** | **Dosis** | **Schedule** | **Period** |
| --- | --- | --- | --- | --- | --- |
| afatinib | MedChem Express (HY-10261) | oral | 20 mg/kg | 1X daily | 3 weeks* |
| axitinib | Selleckchem (S1005) | oral | 30 mg/kg | 1X daily | 3 weeks* |
| B20 | Merck | intraperitoneal | 5 mg/kg | 2X week | 3 weeks* |
| bevacizumab | Genentech | intraperitoneal | 50 mg/kg | 2X week | 3 weeks* |
| cabozantinib | MedChem Express (HY-13016) | oral | 10 mg/kg | 1X daily | 3 weeks* |
| cabozantinib | MedChem Express (HY-13016) | oral | 30 mg/kg | 1X daily | 3 weeks* |
| crizotinib | Selleckchem (S1068) | oral | 50 mg/kg | 1X daily | 3 weeks* |
| MEKi | Selleckchem (S1036) | oral | 1 mg/kg | 1X daily | 3 weeks* |
| MEKi + Cabozantinib | Selleckchem (S1036), MedChem Express (HY-13016) | oral | 1 mg/kg + 30 mg/kg | 1X daily | 3 weeks* |
| pazopanib | MedChem Express (HY-10208) | oral | 50 mg/kg | 1X daily | 3 weeks* |
| regorafenib | Selleckchem (S1178) | oral | 10 mg/kg | 1X daily | 3 weeks* |
| sorafenib | Selleckchem (S7397) | oral | 60 mg/kg | 1X daily | 3 weeks* |
| *or until the tumors reach the humane endpoint | |  |  |  |  |
